# Supplementary material for: Flanking Variation Influences Rates of Stutter in Simple Repeats
Source: Genes (Basel). 2017 Nov 17;8(11):329. doi: 10.3390/genes8110329 (PMC5704242; doi:10.3390/genes8110329)
Supplement: Supplementary file 1 [file genes-08-00329-s001.xlsx]

## Sheet: FlankingHaplotypes
		Supplemental Table 1. The two most-frequent haplotypic backgrounds of the 10 loci listed in table 2. The haplotypic background is broken into the 5' and 3' flanking sequences, and alignments (given a constant LUS) are depicted below.
Flanking Index	Type of change	Locus	Count	Motif	5' Flank	3' Flank
1		D13S317	364	TATC	TCTGACCCATCTAACGCCTATCTGTATTTACAAATACAT	AATCAATCATCTATCTATCTTTCTGTCTGTCTTTTTGGG
2	AATC Deletion (Adjacent)	D13S317	128	TATC	TCTGACCCATCTAACGCCTATCTGTATTTACAAATACAT	----AATCATCTATCTATCTTTCTGTCTGTCTTTTTGGG
1		D16S539	258	GATA	TCCTCTTCCCTAGATCAATACAGACAGACAGACAGGTG	TCATTGAAAGACAAAACAGAGATGGATGATAGATAC
2	A->C (Nonadjacent)	D16S539	161	GATA	TCCTCTTCCCTAGATCAATACAGACAGACAGACAGGTG	TCATTGAAAGACAAACCAGAGATGGATGATAGATAC
1		D19S433	298	CCTT	AATAAAAATCTTCTCTCTTTCTTCCTCTCT	CCTACCTTCTTTCCTTCAACAGAATCTTATTCTGTTGCCCAGGCTGGAGTGCAGTGGTACAATTATAGCT
2	TC Deletion (Nonadjacent)	D19S433	73	CCTT	AATAAAAATCTTCTCTCTTTCTTCCTCTCT	CCTACCT--TTTCCTTCAACAGAATCTTATTCTGTTGCCCAGGCTGGAGTGCAGTGGTACAATTATAGCT
1		D1S1656	379	TCTA	TTCAGAGAAATAGAATCACTAGGGAACCAAATATATATACATACAATTAAACACACACACACCTA
2	CCTA Deletion (Adjacent)	D1S1656	181	TCTA	TTCAGAGAAATAGAATCACTAGGGAACCAAATATATATACATACAATTAAACACACACACA----
1		D2S441	193	TCTA	CCAGGAACTGTGGCTCATCTATGAAAACT	--------TATCATAACACCACAGCCACTTA
2	TCTGTCTA Insertion (Adjacent)	D2S441	94	TCTA	CCAGGAACTGTGGCTCATCTATGAAAACT	TCTGTCTATATCATAACACCACAGCCACTTA
1		D5S818	243	ATCT	TATTTATACCTCT	TCAAAAT
2	CTCT Deletion (Adjacent)	D5S818	119	ATCT	TATTTATAC----	TCAAAAT
1		D7S820	337	TATC	TATTTAGTGAGATAAAAAAAAACTATCAATCTGTC	GTTAGTTCGTTCTAAACTAT
2	G->A (Nonadjacent)	D7S820	82	TATC	TATTTAGTGAGATAAAAAAAAACTATCAATCTGTC	GTTAGTTCATTCTAAACTAT
1		D8S1179	266	TCTA	--------	TTCCC
2	TCTATCTG Insertion (Adjacent)	D8S1179	153	TCTA	TCTATCTG	TTCCC
1		D9S1122	117	TAGA	AGATAACTGTAGATAGGTAGATCGA	TATTAAT
2	TAGATCGA Deletion (Adjacent)	D9S1122	111	TAGA	AGATAACTGTAGATAGG--------	TATTAAT
1		PENTAD	620	AAAGA	GATCACTTGAGCCTGGAAGGTCGAAGCTGAAGTGAGCCATGATCACACCACTACACTCCAGCCTAGGTGACAGAGCAAGACACCATCTCAAGAAAGAAAAAAAAG	AAAAACGAA
2	AAAGAAAAAAAAG Deletion (Adjacent)	PENTAD	42	AAAGA	GATCACTTGAGCCTGGAAGGTCGAAGCTGAAGTGAGCCATGATCACACCACTACACTCCAGCCTAGGTGACAGAGCAAGACACCATCTCAAG-------------	AAAAACGAA
